# Supplementary material for: Enhanced mitophagy in bronchial fibroblasts from severe asthmatic patients
Source: PubMed Central journal article supplement (PMC7704010; doi:10.1371/journal.pone.0242695), 2020-11-30

**Figure 2** (Lanes highlighted in red are not included in this study)

Loading order: Ladder->NHBF->DHBF-> X->X

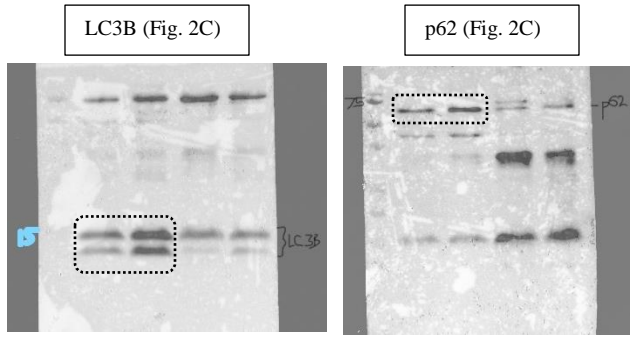

Loading order: Ladder->gap->X->X->X->X->NHBF->X->DHBF->X-> X->X->X->X

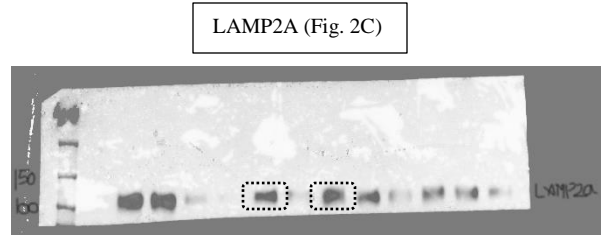

Loading order: Ladder-> X->X->X->X->NHBF->NHBF+E64d+PepA->DHBF->DHBF+E64d+PepA->X->X->X->X

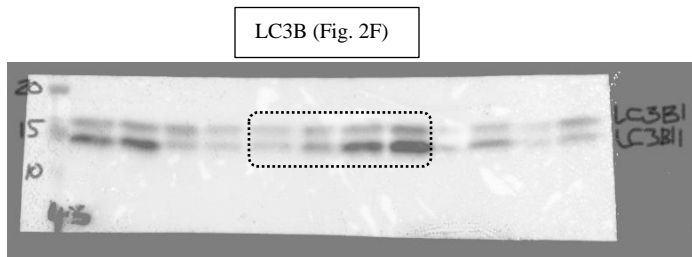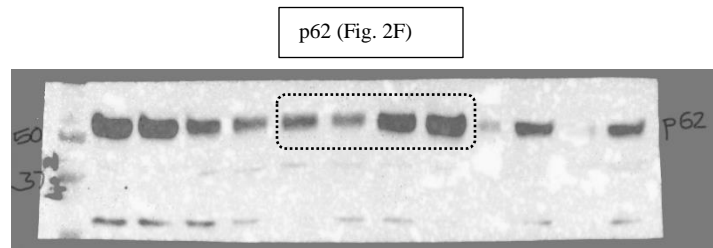

**Figure 3**

Loading order: Ladder-> NHBF (12h)-> NHBF (24h)->DHBF (12h)-> DHBF (24h)

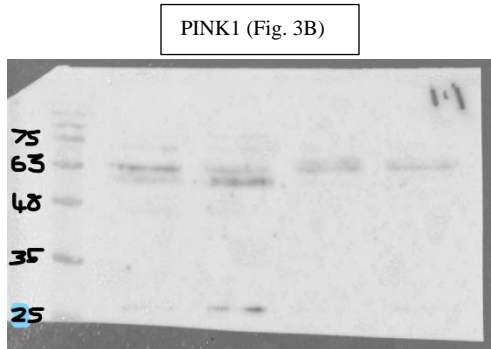

Loading order: Ladder-> NHBF->DHBF-> X->X

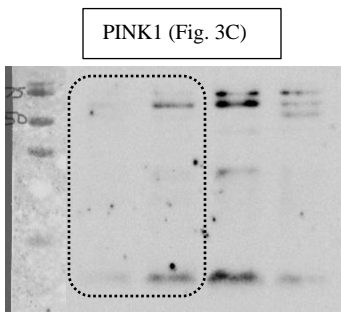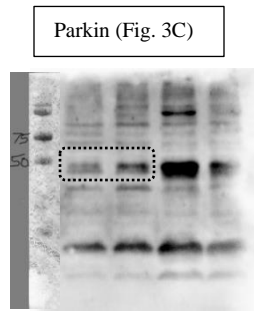

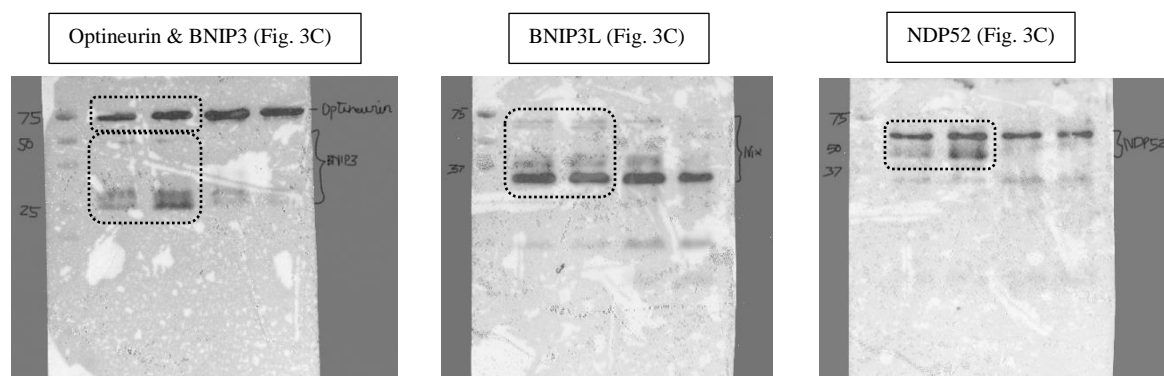

Loading order: Ladder-> **X**->**X**->**X**->**X**-> NHBF->NHBF+E64d+PepA->DHBF->DHBF+E64d+PepA->**X**->**X**->**X**->**X**

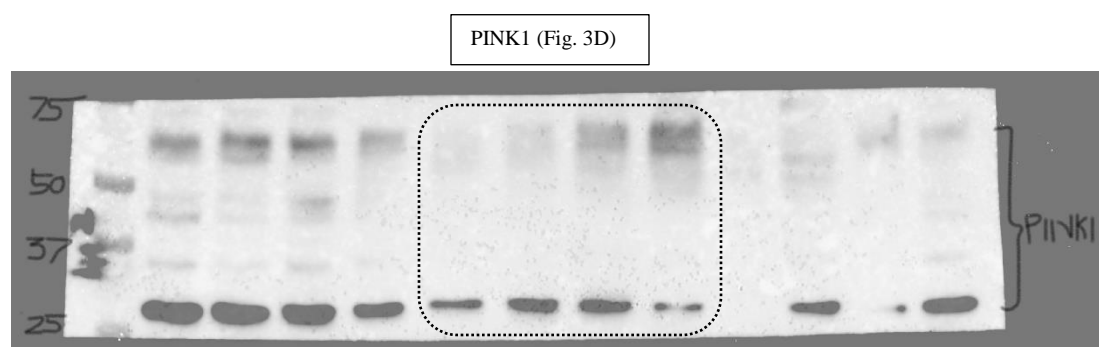

**Figure 5**

Loading order: Ladder->gap->NHBF->**X**->DHBF->**X**

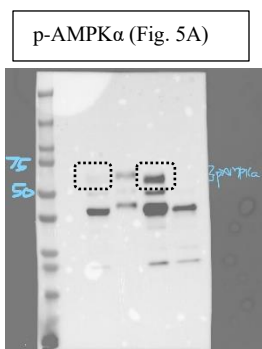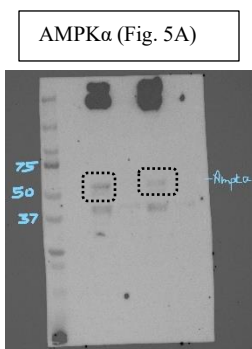

Loading order: **X**->**X**->**X**->NHBF->DHBF->**X**->**X**->**X**->**X**

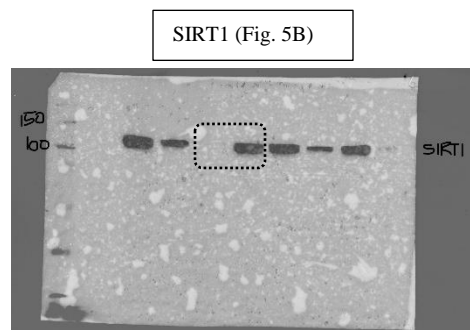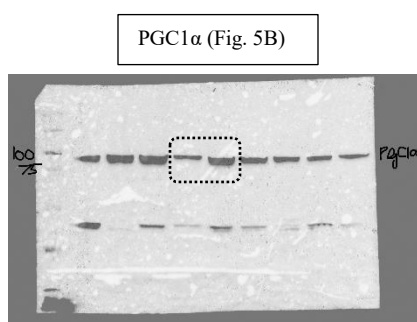

Supplement: pone.0242695.s001.pdf [file pone.0242695.s001.pdf]
